# Supplementary material
Source: PubMed Central journal article supplement (PMC9080742)
Supplement: RA-008-C8RA03073A-s001.pdf [file RA-008-C8RA03073A-s001.pdf]

## SUPPORTING INFORMATION

### In situ Monitoring of SI-ATRP Throughout Multiple Reinitiations under Flow by Means of the Quartz Crystal Microbalance

Joydeb Mandal<sup>1</sup>, Varunprasaath R.S.<sup>1,2</sup>, Wenqing Yan<sup>1</sup>, Mohammad Divandari<sup>1</sup>, Nicholas D. Spencer<sup>1</sup>, Matthias Dübner<sup>1</sup>

<sup>1</sup> *Laboratory for Surface Science and Technology, Department of Materials, ETH Zurich, Vladimir-Prelog-Weg 5, CH-8093 Zurich, Switzerland*

<sup>2</sup> *Indian Institute of Science, Bangalore, India*

The transient but sharp change in frequency ( $\Delta F$ ) at the onset of polymerization is mainly due to a change of viscosity because of the replacement of IRM (water + monomer + ligand) by CRM (water + monomer + ligand + CuCl + CuBr<sub>2</sub>). But at the washing step, a higher degree of solvation of the polymer brush in IRM compared to the solvation in CRM counteracts the effect of viscosity and a decrease in frequency ( $\Delta F$ ) is observed upon replacement of CRM by IRM (S2-S7). Such differential solvation could be caused by an interaction of -OH groups of poly(HEMA) brushes with Cu(II) as it is observed with polyvinyl alcohol.<sup>1</sup> Notably, an opposite trend is observed in the washing step when SI-ATRP was performed in 7:3 HEMA/water mixture at 25 °C (S1) due to very low polymer-brush thickness (3 nm dry thickness) where again the change in the viscosity dominates the effect of solvation of the polymer brush in IRM.

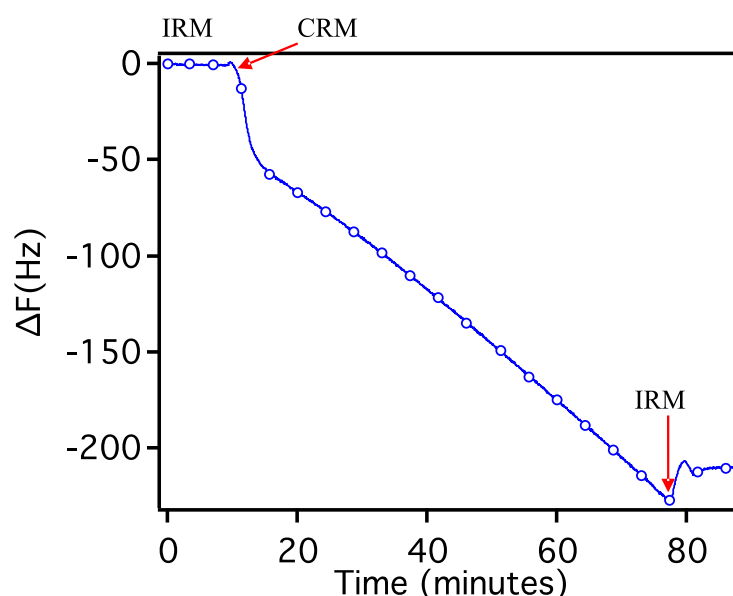

**Figure S1.** Frequency ( $\Delta F$ ) changes measured *in situ* by QCM during SI-ATRP of 7:3 HEMA/water mixture, carried out under continuous flow of CRM with a relative 100 % catalyst concentration at 25 °C.

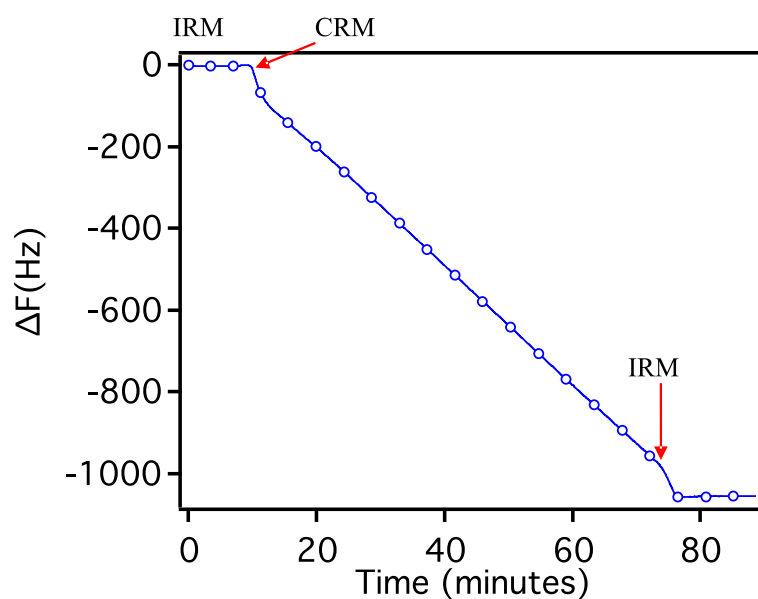

**Figure S2.** Frequency ( $\Delta F$ ) changes measured *in situ* by QCM during SI-ATRP of 1:1 HEMA/water mixture, carried out under continuous flow of CRM with a relative 100 % catalyst concentration at 25 °C.

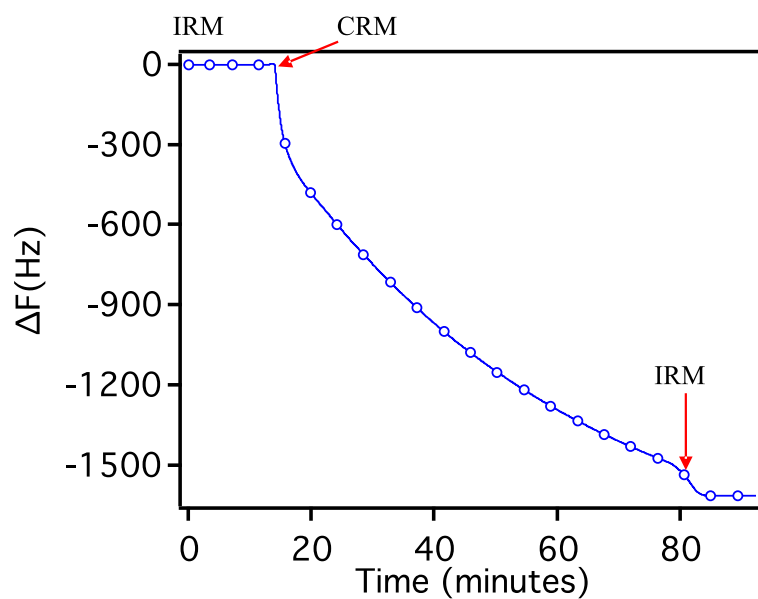

**Figure S3.** Frequency ( $\Delta F$ ) changes measured *in situ* by QCM during SI-ATRP of 3:7 HEMA/water mixture, carried out under continuous flow of CRM with a relative 100 % catalyst concentration at 25 °C.

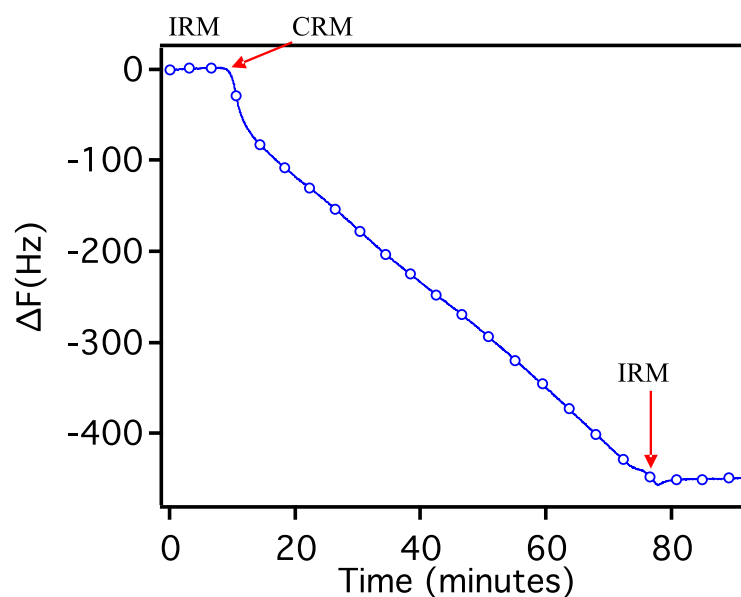

**Figure S4.** Frequency ( $\Delta F$ ) changes measured *in situ* by QCM during SI-ATRP of 7:3 HEMA/water mixture, carried out under continuous flow of CRM with a relative 100 % catalyst concentration at 35 °C.

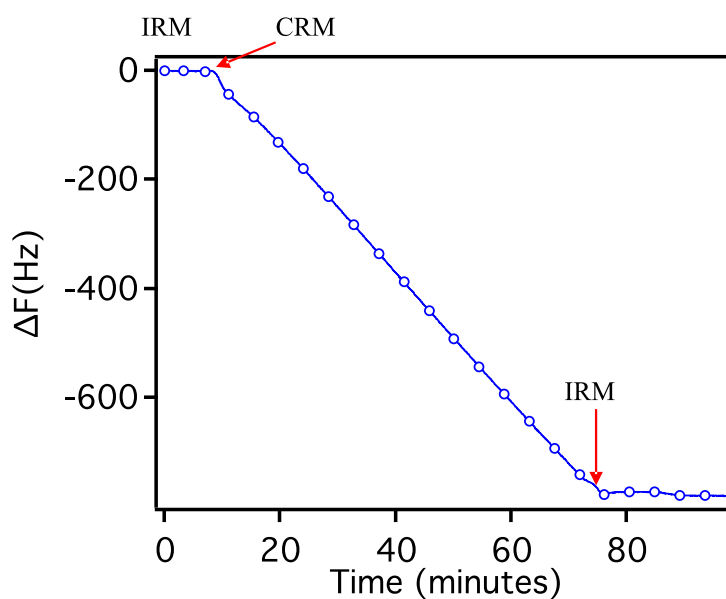

**Figure S5.** Frequency ( $\Delta F$ ) changes measured *in situ* by QCM during SI-ATRP of 7:3 HEMA/water mixture, carried out under continuous flow of CRM with a relative 100 % catalyst concentration at 45 °C.

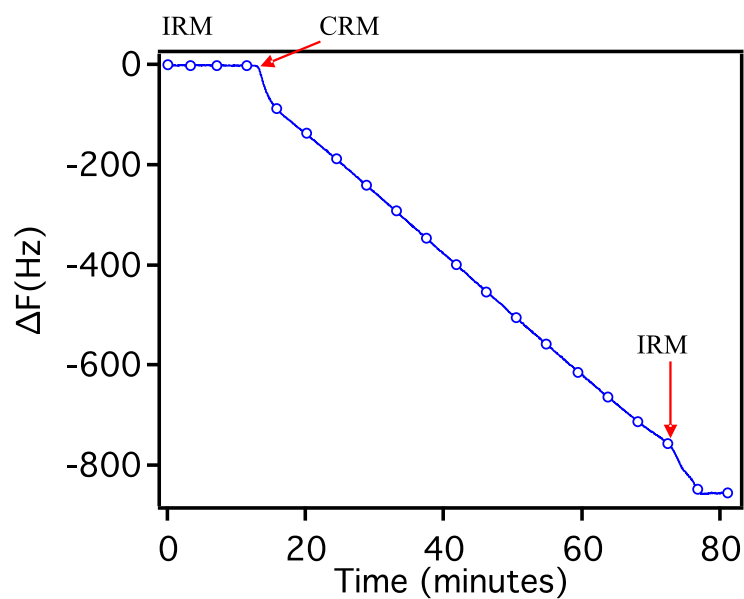

**Figure S6.** Frequency ( $\Delta F$ ) changes measured *in situ* by QCM during SI-ATRP of 1:1 HEMA/water mixture, carried out under continuous flow of CRM with a relative 70 % catalyst concentration at 25 °C.

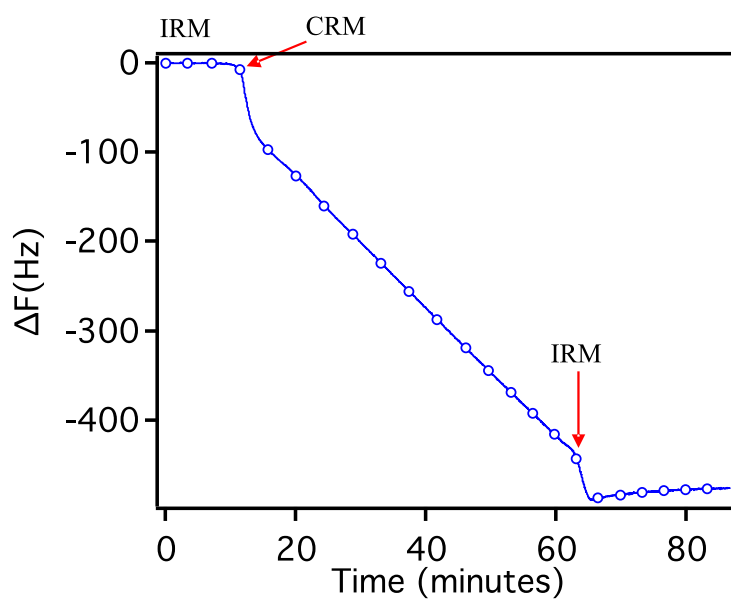

**Figure S7.** Frequency ( $\Delta F$ ) changes measured *in situ* by QCM during SI-ATRP of 1:1 HEMA/water mixture, carried out under continuous flow of CRM with a relative 40 % catalyst concentration at 25 °C.

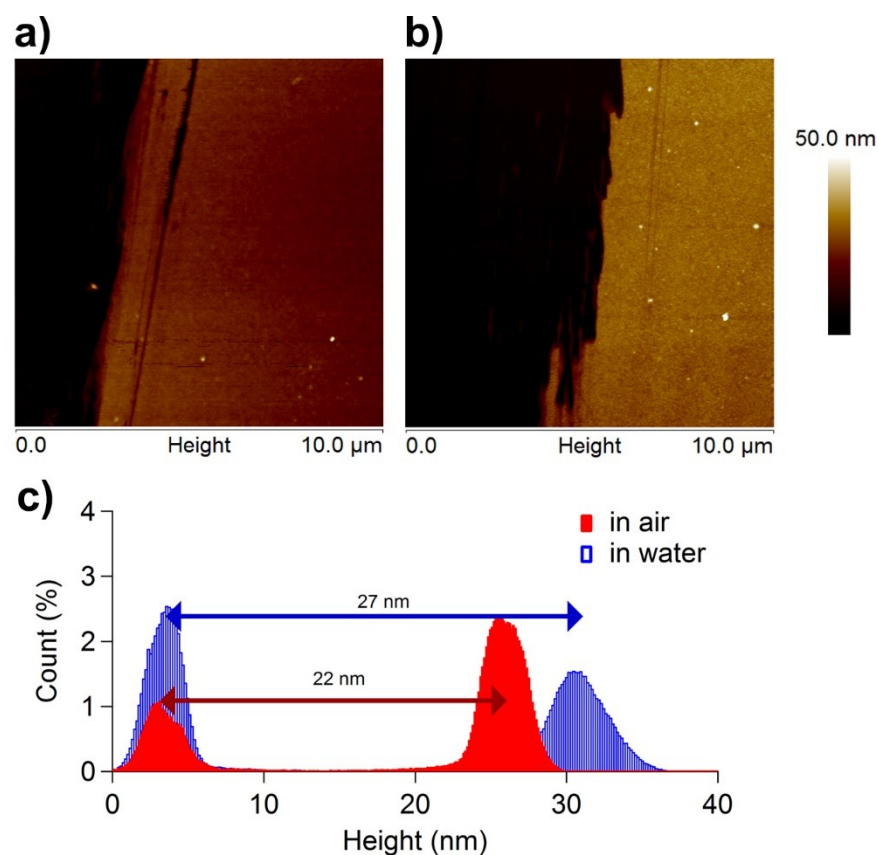

**Figure S8.** Step-height AFM images of a PHEMA film synthesized using 40 % catalyst. a) AFM height image acquired using TappingMode® in air, b) AFM height image acquired using PeakForce® tapping in water and c) height image histograms of (a) and (b) showing distribution film thickness.

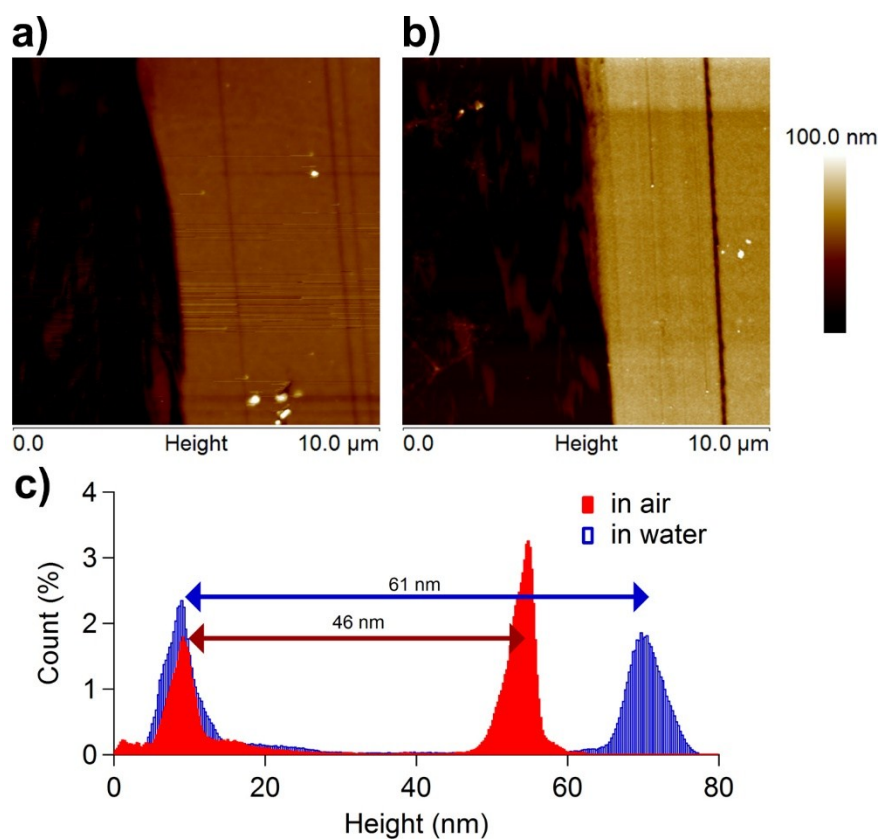

**Figure S9.** Step height AFM images of PHEMA film synthesized using 70 % catalyst. a) AFM height image acquired using TappingMode® in air, b) AFM height image acquired using PeakForce® tapping in water and c) height image histograms of (a) and (b) showing distribution film thickness.

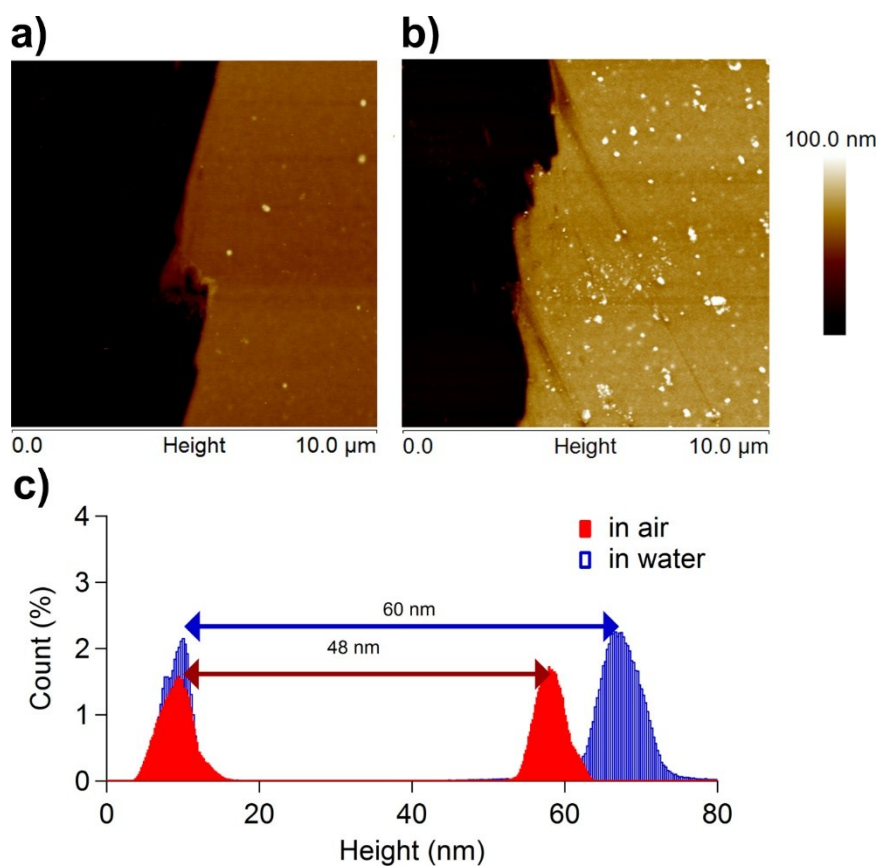

**Figure S10.** Step height AFM images of PHEMA film synthesized using 100 % catalyst. a) AFM height image acquired using TappingMode® in air, b) AFM height image acquired using PeakForce® tapping in water and c) height image histograms of (a) and (b) showing distribution film thickness.

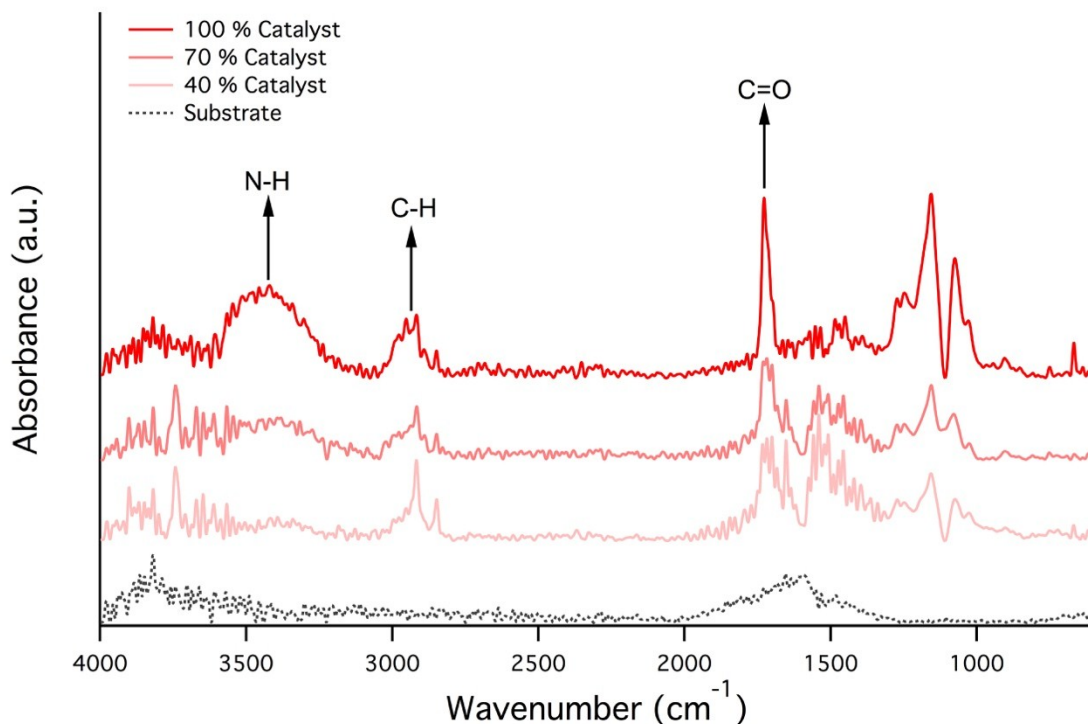

**Figure S11.** FT-IR transmission spectra of the poly(HEMA) modified silicon wafers grafted using various relative catalyst concentrations. Substrate only shows peaks characteristic of water.

**Table 1:** Catalyst composition of the reaction mixtures with different relative catalyst concentration

| Catalyst Concentration (%) | (Water + HEMA) (mL) | Cu(I)Cl (mmol) | 2,2'-bipyridyl (mmol) | Cu(II)Br <sub>2</sub> (mmol) |
|----------------------------|---------------------|----------------|-----------------------|------------------------------|
| 100                        | 15                  | 1.0            | 3.0                   | 0.3                          |
| 70                         | 15                  | 0.7            | 2.1                   | 0.21                         |
| 30                         | 15                  | 0.3            | 0.9                   | 0.09                         |

The catalyst concentration was varied with respect to the total volume of water and HEMA mixture. So, the concentration of catalyst in this manuscript is mmol mL<sup>-1</sup> of reaction mixture.

Reference

1. Hojo, N.; Shirai, H.; Hayashi, S. In *Complex formation between poly (vinyl alcohol) and metallic ions in aqueous solution*, Journal of Polymer Science: Polymer Symposia, Wiley Online Library: 1974; pp 299-307.
